# Supplementary material for: The Ecology and Phylogeny of Hosts Drive the Enzootic Infection Cycles of Hantaviruses
Source: MDPI journal article supplement (doi:10.3390/v11070671), 2019-07-23
Supplement: s1 [file s1]

**S3.** Rodent hosts of *Orthohantaviruses* (Order: Bunyavirales; Family: Hantaviridae) from assemblages reported in literature published between 1971-2014. Species are arranged alphabetically and in decreasing taxonomic hierarchy. Infection were confirmed by RT-PCR or antibody detection assays. (Wilson, D.E.; Reeder, D.M. Mammal species of the world a taxonomic and geographic reference, 3rd ed.; The Johns Hopkins University Press: Baltimore, MD, USA, 2005).

| Suborder       | Family              | Subfamily            | Genus              | Species                         | Sites | N <sub>tot</sub> | N <sub>inf</sub> |
|----------------|---------------------|----------------------|--------------------|---------------------------------|-------|------------------|------------------|
| CASTORIMORPHA  | <i>Geomyidae</i>    |                      | <i>Geomys</i>      | <i>Geomys bursarius</i>         | 1     | 1                | 0                |
|                |                     |                      | <i>Thomomys</i>    | <i>Thomomys bottae</i>          | 2     | 14               | 0                |
|                | <i>Heteromyidae</i> | <i>Dipodomysinae</i> | <i>Dipodomys</i>   | <i>Dipodomys microps</i>        | 1     | 11               | 0                |
|                |                     |                      |                    | <i>Dipodomys ordii</i>          | 13    | 108              | 0                |
|                |                     |                      |                    | <i>Dipodomys spectabilis</i>    | 1     | 1                | 0                |
|                |                     |                      |                    |                                 |       |                  |                  |
|                |                     | <i>Heteromyinae</i>  | <i>Heteromys</i>   | <i>Heteromys anomalus</i>       | 4     | 18               | 1                |
|                |                     |                      |                    |                                 |       |                  |                  |
|                |                     |                      | <i>Liomys</i>      | <i>Liomys irroratus</i>         | 1     | 12               | 1                |
|                |                     |                      |                    | <i>Liomys pictus</i>            | 1     | 18               | 0                |
|                |                     |                      |                    | <i>Liomys salvini</i>           | 1     | 2                | 0                |
|                |                     |                      |                    | <i>Liomys spectabilis</i>       | 1     | 6                | 0                |
|                |                     | <i>Perognathinae</i> | <i>Chaetodipus</i> | <i>Chaetodipus baileyi</i>      | 1     | 1                | 0                |
|                |                     |                      |                    | <i>Chaetodipus californicus</i> | 2     | 4                | 0                |
|                |                     |                      |                    | <i>Chaetodipus eremicus</i>     | 1     | 18               | 0                |
|                |                     |                      |                    | <i>Chaetodipus hispidus</i>     | 10    | 28               | 0                |
|                |                     |                      |                    | <i>Chaetodipus intermedius</i>  | 1     | 13               | 0                |
|                |                     |                      |                    | <i>Chaetodipus penicillatus</i> | 3     | 33               | 0                |
|                |                     |                      | <i>Perognathus</i> | <i>Perognathus fasciatus</i>    | 1     | 2                | 1                |
|                |                     |                      |                    | <i>Perognathus flavescens</i>   | 1     | 2                | 0                |
|                |                     |                      |                    | <i>Perognathus flavus</i>       | 5     | 28               | 0                |
|                |                     |                      |                    | <i>Perognathus parvus</i>       | 8     | 125              | 1                |
| HYSTRICOMORPHA | <i>Echimyidae</i>   | <i>Eumysopinae</i>   | <i>Proechimys</i>  | <i>Proechimys canicollis</i>    | 1     | 2                | 1                |
|                |                     |                      |                    | <i>Proechimys guairae</i>       | 2     | 3                | 0                |
|                |                     |                      |                    | <i>Proechimys guyannensis</i>   | 1     | 1                | 0                |
| MYOMORPHA      | <i>Cricetidae</i>   | <i>Arvicolinae</i>   | <i>Eothenomys</i>  | <i>Eothenomys miletus</i>       | 1     | 129              | 23               |
|                |                     |                      | <i>Lemmiscus</i>   | <i>Lemmiscus curtatus</i>       | 6     | 35               | 0                |

|           |            |                     |                                |    |     |    |
|-----------|------------|---------------------|--------------------------------|----|-----|----|
| MYOMORPHA | Neotominae | <i>Microtus</i>     | <i>Microtus agrestis</i>       | 8  | 109 | 8  |
|           |            |                     | <i>Microtus arvalis</i>        | 6  | 126 | 17 |
|           |            |                     | <i>Microtus californicus</i>   | 1  | 6   | 1  |
|           |            |                     | <i>Microtus fortis</i>         | 2  | 25  | 3  |
|           |            |                     | <i>Microtus longicaudus</i>    | 5  | 24  | 0  |
|           |            |                     | <i>Microtus mexicanus</i>      | 7  | 41  | 3  |
|           |            |                     | <i>Microtus montanus</i>       | 14 | 59  | 1  |
|           |            |                     | <i>Microtus ochrogaster</i>    | 4  | 11  | 1  |
|           |            |                     | <i>Microtus pennsylvanicus</i> | 6  | 230 | 60 |
|           |            |                     | <i>Microtus pinetorum</i>      | 1  | 2   | 0  |
|           |            |                     | <i>Microtus subterraneus</i>   | 2  | 3   | 0  |
|           |            | <i>Myodes</i>       | <i>Myodes gapperi</i>          | 9  | 18  | 2  |
|           |            |                     | <i>Myodes glareolus</i>        | 15 | 571 | 77 |
|           |            |                     | <i>Myodes rufocanus</i>        | 4  | 142 | 24 |
|           |            | <i>Baiomys</i>      | <i>Baiomys musculus</i>        | 5  | 84  | 2  |
|           |            |                     | <i>Baiomys taylori</i>         | 11 | 185 | 2  |
|           |            | <i>Megadontomys</i> | <i>Megadontomys thomasi</i>    | 2  | 7   | 1  |
|           |            | <i>Neotoma</i>      | <i>Neotoma albigula</i>        | 13 | 156 | 2  |
|           |            |                     | <i>Neotoma cinerea</i>         | 5  | 16  | 0  |
|           |            |                     | <i>Neotoma floridana</i>       | 4  | 15  | 0  |
|           |            |                     | <i>Neotoma lepida</i>          | 6  | 75  | 0  |
|           |            |                     | <i>Neotoma leucodon</i>        | 2  | 20  | 0  |
|           |            |                     | <i>Neotoma mexicana</i>        | 12 | 40  | 0  |
|           |            |                     | <i>Neotoma micropus</i>        | 4  | 42  | 0  |
|           |            |                     | <i>Neotoma picta</i>           | 2  | 8   | 1  |
|           |            |                     | <i>Neotoma stephensi</i>       | 2  | 8   | 0  |
|           |            | <i>Neotomodon</i>   | <i>Neotomodon alstoni</i>      | 2  | 3   | 0  |
|           |            | <i>Ochrotomys</i>   | <i>Ochrotomys nuttalli</i>     | 2  | 2   | 0  |
|           |            | <i>Onychomys</i>    | <i>Onychomys arenicola</i>     | 2  | 3   | 0  |
|           |            |                     | <i>Onychomys leucogaster</i>   | 8  | 28  | 1  |

MYOMORPHA

|                        |                                   |    |      |     |
|------------------------|-----------------------------------|----|------|-----|
|                        | <i>Onychomys torridus</i>         | 1  | 1    | 0   |
| <i>Osgoodomys</i>      | <i>Osgoodomys banderanus</i>      | 2  | 11   | 0   |
| <i>Peromyscus</i>      | <i>Peromyscus attwateri</i>       | 4  | 181  | 9   |
|                        | <i>Peromyscus aztecus</i>         | 1  | 4    | 0   |
|                        | <i>Peromyscus beatae</i>          | 3  | 59   | 17  |
|                        | <i>Peromyscus boylii</i>          | 18 | 359  | 72  |
|                        | <i>Peromyscus californicus</i>    | 1  | 6    | 0   |
|                        | <i>Peromyscus difficilis</i>      | 3  | 12   | 0   |
|                        | <i>Peromyscus eremicus</i>        | 4  | 24   | 1   |
|                        | <i>Peromyscus gossypinus</i>      | 2  | 6    | 2   |
|                        | <i>Peromyscus hylocytes</i>       | 3  | 29   | 4   |
|                        | <i>Peromyscus lepturus</i>        | 1  | 5    | 0   |
|                        | <i>Peromyscus leucopus</i>        | 38 | 581  | 50  |
|                        | <i>Peromyscus levipes</i>         | 5  | 72   | 11  |
|                        | <i>Peromyscus maniculatus</i>     | 78 | 3571 | 460 |
|                        | <i>Peromyscus megalops</i>        | 2  | 53   | 1   |
|                        | <i>Peromyscus melanophrys</i>     | 3  | 18   | 0   |
|                        | <i>Peromyscus melanotis</i>       | 6  | 78   | 5   |
|                        | <i>Peromyscus mexicanus</i>       | 3  | 12   | 0   |
|                        | <i>Peromyscus nasutus</i>         | 3  | 4    | 1   |
| <i>Peromyscus</i>      | <i>Peromyscus ochraventer</i>     | 2  | 23   | 2   |
|                        | <i>Peromyscus pectoralis</i>      | 2  | 8    | 1   |
|                        | <i>Peromyscus perfulvus</i>       | 1  | 16   | 0   |
|                        | <i>Peromyscus spicilegus</i>      | 1  | 9    | 2   |
|                        | <i>Peromyscus truei</i>           | 22 | 138  | 4   |
| <i>Reithrodontomys</i> | <i>Reithrodontomys bakeri</i>     | 1  | 3    | 0   |
|                        | <i>Reithrodontomys fulvescens</i> | 23 | 492  | 2   |
|                        | <i>Reithrodontomys humulis</i>    | 2  | 3    | 0   |
|                        | <i>Reithrodontomys megalotis</i>  | 25 | 145  | 20  |
|                        | <i>Reithrodontomys mexicanus</i>  | 3  | 20   | 0   |

|           |                     |                     |                                    |    |     |    |
|-----------|---------------------|---------------------|------------------------------------|----|-----|----|
| MYOMORPHA | Sigmodontinae       | <i>Abrothrix</i>    | <i>Reithrodontomys microdon</i>    | 1  | 1   | 1  |
|           |                     |                     | <i>Reithrodontomys montanus</i>    | 2  | 3   | 0  |
|           |                     |                     | <i>Reithrodontomys sumichrasti</i> | 4  | 35  | 12 |
|           |                     |                     | <i>Abrothrix longipilis</i>        | 3  | 92  | 4  |
|           |                     | <i>Akodon</i>       | <i>Abrothrix olivaceus</i>         | 2  | 84  | 6  |
|           |                     |                     | <i>Akodon aliquantulus</i>         | 1  | 3   | 0  |
|           |                     |                     | <i>Akodon azarae</i>               | 6  | 304 | 27 |
|           |                     |                     | <i>Akodon cursor</i>               | 3  | 33  | 2  |
|           |                     | <i>Calomys</i>      | <i>Akodon montensis</i>            | 3  | 30  | 2  |
|           |                     |                     | <i>Akodon simulator</i>            | 1  | 140 | 4  |
|           |                     |                     | <i>Akodon toba</i>                 | 2  | 5   | 1  |
|           |                     |                     | <i>Calomys callosus</i>            | 5  | 179 | 10 |
|           |                     | <i>Graomys</i>      | <i>Calomys laucha</i>              | 3  | 23  | 5  |
|           |                     |                     | <i>Calomys musculus</i>            | 2  | 6   | 0  |
|           |                     |                     | <i>Calomys tener</i>               | 3  | 17  | 0  |
|           |                     |                     | <i>Graomys griseoflavus</i>        | 1  | 2   | 0  |
|           | <i>Holochilus</i>   | <i>Necromys</i>     | <i>Holochilus chacarius</i>        | 1  | 11  | 0  |
|           |                     |                     | <i>Holochilus sciureus</i>         | 2  | 52  | 15 |
|           |                     |                     | <i>Necromys lasiurus</i>           | 11 | 293 | 18 |
|           |                     |                     | <i>Necromys lenguarum</i>          | 1  | 2   | 0  |
|           | <i>Oligoryzomys</i> | <i>Nectomys</i>     | <i>Necromys obscurus</i>           | 1  | 1   | 0  |
|           |                     |                     | <i>Nectomys squamipes</i>          | 4  | 7   | 0  |
|           |                     |                     | <i>Oligoryzomys chacoensis</i>     | 1  | 4   | 0  |
|           |                     |                     | <i>Oligoryzomys flavescens</i>     | 9  | 64  | 5  |
|           | <i>Oligoryzomys</i> | <i>Oligoryzomys</i> | <i>Oligoryzomys fornesi</i>        | 3  | 14  | 7  |
|           |                     |                     | <i>Oligoryzomys fulvescens</i>     | 3  | 3   | 2  |
|           |                     |                     | <i>Oligoryzomys griSeoulus</i>     | 2  | 7   | 1  |
|           |                     |                     | <i>Oligoryzomys longicaudatus</i>  | 5  | 164 | 20 |
|           | <i>Oligoryzomys</i> | <i>Oligoryzomys</i> | <i>Oligoryzomys microtis</i>       | 3  | 96  | 13 |
|           |                     |                     | <i>Oligoryzomys nigripes</i>       | 11 | 116 | 16 |

MYOMORPHA

|                  |                   |                      |                                |    |      |     |
|------------------|-------------------|----------------------|--------------------------------|----|------|-----|
|                  |                   | <i>Oryzomys</i>      | <i>Oryzomys alfaroi</i>        | 1  | 1    | 0   |
|                  |                   |                      | <i>Oryzomys chacoensis</i>     | 1  | 1    | 0   |
|                  |                   |                      | <i>Oryzomys chapmani</i>       | 1  | 4    | 0   |
|                  |                   |                      | <i>Oryzomys couesi</i>         | 4  | 419  | 33  |
|                  |                   |                      | <i>Oryzomys melanotis</i>      | 1  | 4    | 0   |
|                  |                   |                      | <i>Oryzomys mexicanus</i>      | 1  | 3    | 0   |
|                  |                   |                      | <i>Oryzomys palustris</i>      | 17 | 942  | 140 |
|                  |                   |                      | <i>Oryzomys ratticeps</i>      | 1  | 4    | 0   |
|                  |                   | <i>Oxymycterus</i>   | <i>Oxymycterus inca</i>        | 2  | 9    | 0   |
|                  |                   |                      | <i>Oxymycterus judex</i>       | 1  | 5    | 0   |
|                  |                   |                      | <i>Oxymycterus nasutus</i>     | 1  | 89   | 4   |
|                  |                   |                      | <i>Oxymycterus paramensis</i>  | 1  | 3    | 0   |
|                  |                   | <i>Pseudoryzomys</i> | <i>Pseudoryzomys simplex</i>   | 1  | 1    | 0   |
|                  |                   | <i>Scapteromys</i>   | <i>Scapteromys tumidus</i>     | 1  | 19   | 0   |
|                  |                   | <i>Sigmodon</i>      | <i>Sigmodon alleni</i>         | 1  | 1    | 0   |
|                  |                   |                      | <i>Sigmodon alstoni</i>        | 9  | 315  | 45  |
|                  |                   |                      | <i>Sigmodon arizonae</i>       | 1  | 9    | 0   |
|                  |                   |                      | <i>Sigmodon hirsutus</i>       | 1  | 37   | 0   |
|                  |                   |                      | <i>Sigmodon hispidus</i>       | 33 | 1863 | 75  |
|                  |                   |                      | <i>Sigmodon macotensis</i>     | 2  | 97   | 6   |
|                  |                   |                      | <i>Sigmodon toltecus</i>       | 2  | 2    | 0   |
|                  |                   | <i>Thaptomys</i>     | <i>Thaptomys nigrita</i>       | 1  | 2    | 1   |
|                  |                   | <i>Zygodontomys</i>  | <i>Zygodontomys brevicauda</i> | 10 | 145  | 5   |
|                  | <i>Tylomyinae</i> | <i>Nyctomys</i>      | <i>Nyctomys sumichrasti</i>    | 1  | 1    | 0   |
| <i>Dipodidae</i> | <i>Zapodinae</i>  | <i>Zapus</i>         | <i>Zapus princeps</i>          | 5  | 26   | 0   |
| <i>Muridae</i>   | <i>Murinae</i>    | <i>Apodemus</i>      | <i>Apodemus agrarius</i>       | 13 | 460  | 19  |
|                  |                   |                      | <i>Apodemus argenteus</i>      | 3  | 46   | 0   |
|                  |                   |                      | <i>Apodemus chevrieri</i>      | 1  | 31   | 0   |
|                  |                   |                      | <i>Apodemus draco</i>          | 1  | 19   | 0   |
|                  |                   |                      | <i>Apodemus flavicollis</i>    | 12 | 309  | 68  |

|              |                  |                       |                         |                                  |    |      |     |
|--------------|------------------|-----------------------|-------------------------|----------------------------------|----|------|-----|
| MYOMORPHA    |                  |                       |                         | <i>Apodemus peninsulae</i>       | 1  | 70   | 4   |
|              |                  |                       |                         | <i>Apodemus speciosus</i>        | 3  | 26   | 0   |
|              |                  |                       |                         | <i>Apodemus sylvaticus</i>       | 10 | 188  | 10  |
|              |                  |                       |                         | <i>Apodemus uralensis</i>        | 2  | 6    | 1   |
|              |                  |                       |                         | <i>Bandicota</i>                 |    |      |     |
|              |                  |                       |                         | <i>Bandicota indica</i>          | 13 | 360  | 18  |
|              |                  |                       |                         | <i>Bandicota savilei</i>         | 3  | 122  | 5   |
|              |                  |                       |                         | <i>Berylmys</i>                  |    |      |     |
|              |                  |                       |                         | <i>Berylmys berdmorei</i>        | 5  | 34   | 0   |
|              |                  |                       |                         | <i>Berylmys bowersi</i>          | 2  | 6    | 0   |
|              |                  |                       |                         | <i>Maxomys</i>                   |    |      |     |
|              |                  |                       |                         | <i>Maxomys surifer</i>           | 3  | 108  | 2   |
|              |                  |                       |                         | <i>Mus</i>                       |    |      |     |
|              |                  |                       |                         | <i>Mus caroli</i>                | 6  | 90   | 2   |
|              |                  |                       |                         | <i>Mus cervicolor</i>            | 2  | 45   | 0   |
|              |                  |                       |                         | <i>Mus cookii</i>                | 3  | 107  | 1   |
|              |                  |                       |                         | <i>Mus musculus</i>              | 30 | 400  | 13  |
|              |                  |                       |                         | <i>Niviventer</i>                |    |      |     |
|              |                  |                       |                         | <i>Niviventer confucianus</i>    | 2  | 66   | 7   |
|              |                  |                       |                         | <i>Niviventer fulvescens</i>     | 3  | 17   | 0   |
|              |                  |                       |                         | <i>Rattus</i>                    |    |      |     |
|              |                  |                       |                         | <i>Rattus andamanensis</i>       | 1  | 5    | 0   |
|              |                  |                       |                         | <i>Rattus argentiventer</i>      | 6  | 81   | 1   |
|              |                  |                       |                         | <i>Rattus exulans</i>            | 11 | 537  | 16  |
|              |                  |                       |                         | <i>Rattus flavipectus</i>        | 2  | 50   | 0   |
|              |                  |                       |                         | <i>Rattus fulvescens</i>         | 1  | 2    | 0   |
|              |                  |                       |                         | <i>Rattus losea</i>              | 8  | 281  | 4   |
|              |                  |                       |                         | <i>Rattus nitidus</i>            | 3  | 42   | 4   |
|              |                  |                       |                         | <i>Rattus norvegicus</i>         | 36 | 2424 | 502 |
|              |                  |                       |                         | <i>Rattus rattus</i>             | 26 | 677  | 46  |
|              |                  |                       |                         | <i>Rattus tanezumi</i>           | 13 | 524  | 19  |
| SCIUROMORPHA | <i>Sciuridae</i> | <i>Callosciurinae</i> | <i>Callosciurus</i>     | <i>Callosciurus erythraeus</i>   | 1  | 1    | 0   |
|              |                  | <i>Sciurinae</i>      | <i>Tamiasciurus</i>     | <i>Tamiasciurus douglasii</i>    | 1  | 1    | 0   |
|              |                  |                       |                         | <i>Tamiasciurus hudsonicus</i>   | 5  | 17   | 0   |
|              |                  |                       | <i>Sciurus</i>          | <i>Siurus aberti</i>             | 1  | 4    | 0   |
|              |                  | <i>Xerinae</i>        | <i>Ammospermophilus</i> | <i>Ammospermophilus leucurus</i> | 1  | 2    | 0   |

SCIUROMORPHA

|                          |                                    |    |    |   |
|--------------------------|------------------------------------|----|----|---|
|                          | <i>Ammospermophilus harrisii</i>   | 1  | 1  | 0 |
| <i>Callospermophilus</i> | <i>Callospermophilus lateralis</i> | 4  | 14 | 0 |
| <i>Eutamias</i>          | <i>Eutamias sibiricus</i>          | 1  | 2  | 0 |
| <i>Neotamias</i>         | <i>Neotamias amoenus</i>           | 1  | 5  | 0 |
|                          | <i>Neotamias canipes</i>           | 2  | 5  | 0 |
|                          | <i>Neotamias dorsalis</i>          | 6  | 56 | 0 |
|                          | <i>Neotamias minimus</i>           | 12 | 52 | 2 |
|                          | <i>Neotamias quadrimaculatus</i>   | 1  | 7  | 0 |
|                          | <i>Neotamias quadrivittatus</i>    | 8  | 34 | 0 |
|                          | <i>Neotamias rufus</i>             | 1  | 3  | 0 |
|                          | <i>Neotamias speciosus</i>         | 1  | 8  | 0 |
|                          | <i>Neotamias umbrinus</i>          | 3  | 36 | 0 |
| <i>Tamias</i>            | <i>Tamias striatus</i>             | 4  | 5  | 0 |
| <i>Urocitellus</i>       | <i>Urocitellus armatus</i>         | 2  | 2  | 0 |
| <i>Xerospermophilus</i>  | <i>Xerospermophilus spilosoma</i>  | 1  | 3  | 0 |
|                          | <i>Xerospermophilus variegatus</i> | 9  | 36 | 0 |

---
