# Supplementary material for: The Ecology and Phylogeny of Hosts Drive the Enzootic Infection Cycles of Hantaviruses
Source: MDPI journal article supplement (doi:10.3390/v11070671), 2019-07-23
Supplement: s1 [file s1]

**S2.** Non-rodent small mammal hosts of *Orthohantaviruses* (Order: Bunyavirales; Family: Hantaviridae) from assemblages reported in literature published between 1971-2014. Species are arranged alphabetically and in decreasing taxonomic hierarchy. Infection were confirmed by RT-PCR or antibody detection assays. Taxonomy adopted from (Wilson, D.E.; Reeder, D.M. *Mammal species of the world a taxonomic and geographic reference* , 3rd ed.; The Johns Hopkins University Press: Baltimore, MD, USA, 2005).

| Order           | Family             | Subfamily           | Genus              | Species                                   | Sites | N <sub>tot</sub> | N <sub>inf</sub> |
|-----------------|--------------------|---------------------|--------------------|-------------------------------------------|-------|------------------|------------------|
| CARNIVORA       | <i>Mustelidae</i>  | <i>Mustelinae</i>   | <i>Mustela</i>     | <i>Mustela frenata</i>                    | 1     | 3                | 0                |
|                 |                    |                     |                    | <i>Mustela nivalis</i>                    | 1     | 2                | 0                |
| DIDELPHIMORPHIA | <i>Didelphidae</i> | <i>Didelphinae</i>  | <i>Didelphis</i>   | <i>Didelphis virginiana</i>               | 1     | 3                | 0                |
|                 |                    |                     |                    | <i>Marmosa murina</i>                     | 1     | 1                | 0                |
|                 |                    |                     | <i>Marmosops</i>   | <i>Marmosa paraguayana</i> <sup>1 *</sup> | 1     | 3                | 1                |
|                 |                    |                     |                    | <i>Marmosops incanus</i>                  | 1     | 2                | 0                |
|                 |                    |                     |                    | <i>Marmosops paulensis</i>                | 1     | 2                | 0                |
|                 |                    |                     | <i>Monodelphis</i> | <i>Monodelphis americana</i> <sup>2</sup> | 1     | 1                | 0                |
|                 |                    |                     |                    | <i>Monodelphis iheringi</i> *             | 1     | 6                | 1                |
|                 |                    |                     | <i>Thylamys</i>    | <i>Thylamys elegans</i>                   | 1     | 1                | 0                |
|                 |                    |                     |                    | <i>Thylamys venustus</i>                  | 1     | 2                | 0                |
|                 |                    |                     | <i>Tlacuatzin</i>  | <i>Tlacuatzin canescens</i>               | 1     | 10               | 0                |
| EULIPOTYPHILA   | <i>Soricidae</i>   | <i>Crociturinae</i> | <i>Crocituria</i>  | <i>Crocituria dsinezumi</i>               | 1     | 1                | 0                |
|                 |                    |                     |                    | <i>Crocituria leucodon</i>                | 1     | 3                | 0                |
|                 |                    |                     |                    | <i>Crocituria suaveolens</i>              | 2     | 13               | 0                |
|                 |                    | <i>Soricinae</i>    | <i>Suncus</i>      | <i>Suncus murinus</i> *                   | 20    | 1186             | 19               |
|                 |                    |                     | <i>Blarina</i>     | <i>Blarina brevicauda</i>                 | 4     | 21               | 0                |
|                 |                    |                     |                    | <i>Blarina hylophaga</i>                  | 2     | 3                | 0                |
|                 |                    |                     | <i>Blarinella</i>  | <i>Blarinella wardi</i>                   | 1     | 7                | 0                |
|                 |                    |                     | <i>Cryptotis</i>   | <i>Cryptotis obscura</i>                  | 1     | 1                | 0                |
|                 |                    |                     |                    | <i>Cryptotis parva</i>                    | 1     | 1                | 0                |
|                 |                    |                     | <i>Neomys</i>      | <i>Neomys anomalus</i>                    | 1     | 1                | 0                |
|                 |                    |                     |                    | <i>Neomys fodiens</i>                     | 1     | 2                | 0                |
|                 |                    |                     | <i>Sorex</i>       | <i>Sorex araneus</i>                      | 5     | 9                | 0                |
|                 |                    |                     |                    | <i>Sorex caecutiens</i>                   | 1     | 3                | 0                |
|                 |                    |                     |                    | <i>Sorex fumeus</i>                       | 1     | 1                | 0                |
|                 |                    |                     |                    | <i>Sorex gracillimus</i>                  | 1     | 5                | 0                |
|                 |                    |                     |                    | <i>Sorex sinalis</i>                      | 1     | 5                | 0                |
|                 |                    |                     |                    | <i>Sorex unguiculatus</i>                 | 1     | 6                | 0                |
|                 |                    |                     |                    | <i>Sorex vagrans</i>                      | 1     | 1                | 0                |
|                 |                    |                     | <i>Talpidae</i>    | <i>Talpidae</i>                           | 1     | 6                | 3                |
| LAGOMORPHA      | <i>Leporidae</i>   |                     | <i>Sylvilagus</i>  | <i>Sylvilagus audubonii</i>               | 3     | 5                | 0                |
|                 |                    |                     |                    | <i>Sylvilagus floridanus</i>              | 2     | 2                | 0                |
| SCANDENTIA      | <i>Tupaiaidae</i>  |                     | <i>Tupaia</i>      | <i>Tupaia ferruginea</i> <sup>3</sup>     | 1     | 3                | 0                |

<sup>1</sup> reported as *Micoureus paraguayanus* ; <sup>2</sup> reported as *Monodelphis rubida* ; <sup>3</sup> reported as *Tupaia glis* ; \*infection confirmed with RT-PCR
